# Supplementary material for: Interleukin-33 Contributes to the Induction of Th9 Cells and Antitumor Efficacy by Dectin-1-Activated Dendritic Cells
Source: Front Immunol. 2018 Jul 31;9:1787. doi: 10.3389/fimmu.2018.01787 (PMC6079242; doi:10.3389/fimmu.2018.01787)
Supplement: Supplementary file 1 [file Table_1.XLS]

## Sheet: Sheet1
Supplementary Table 1. Primer pairs used for quantitative real-time PCR (qPCR)
Mouse genes	Sequences
	Forward	Reverse
Il2	5'-TCTACAGCGGAAGCACAGCA	5'-CATCTCCTCAGAAAGTCCACCA
Il33	5'- TTCCAACTCCAAGATTTCCC	5'-TGTCAACAGACGCAGCAAA
Gzmb	5'-AGCAGCCTGAGGCGATAT	5'-CTGGGTCTTCTCCTGTTCTT
Pdcd1	5'-TGGCAATCAGGGTGGCTTCT	5'-GGCGGTTCCAGTTCAGCATA
Prf1	5'-CCACGCATGATCTGCTCTTC	5'-CTTCGGGTTCTGTTCTTCCA
St2	5'-TCACTTCTTGGCTGATGTCCT	5'-TTCATTTCGACCTTCCTCTTC
Gapdh	5'-TGCACCACCAACTGCTTAGC	5'-GGATGCAGGGATGATGTTCT
